# Supplementary material for: A potent and selective small molecule inhibitor of sirtuin 1 promotes differentiation of pluripotent P19 cells into functional neurons
Source: PubMed Central journal article supplement (PMC5041152; doi:10.1038/srep34324), 2016-09-29
Supplement: srep34324-s1.pdf [file srep34324-s1.pdf]

## SUPPLEMENTARY INFORMATION

### **A potent and selective small molecule inhibitor of sirtuin 1 promotes differentiation of pluripotent P19 cells into functional neurons**

Beom Seok Kim,<sup>1</sup> Chang-Hee Lee,<sup>1</sup> Gyeong-Eon Chang,<sup>2</sup> Eunji Cheong,<sup>2</sup> and Injae Shin,<sup>1,\*</sup>

<sup>1</sup>National Creative Research Initiative Center for Biofunctional Molecules, Department of Chemistry, Yonsei University, Seoul 03722, Korea

<sup>2</sup>Department of Biotechnology, College of Life Science and Biotechnology, Yonsei University, Seoul 03722, Korea

\* Corresponding author: [injae@yonsei.ac.kr](mailto:injae@yonsei.ac.kr)

## Methods

**Differentiation of SIRT1 knockdown P19 cells.** SIRT1 knockdown P19 cells were constructed by transfection with a SIRT1 shRNA plasmid (Santa Cruz) using plasmid transfection reagents (Santa Cruz) according to the manufacturer's instruction. Shortly, P19 cells were seeded at approximately  $2 \times 10^5$  per well in a six-well dish, grown to 50–70% confluency, and transfected with 1  $\mu$ g of a SIRT1 shRNA plasmid for 24 h. Stably transfected P19 cells were selected by incubating with 8  $\mu$ g/ml of puromycin (Sigma-Aldrich) for a minimum of 3 weeks.

SIRT1 knockdown P19 cells were seeded at a density of  $10^5$  cells/mL in 90 mm petri dishes under non-adherent culture conditions and allowed for aggregation for 3 days. The embryoid bodies were dissociated into single cells by treatment with 0.25% trypsin-EDTA solution. The cells were seeded in a tissue culture dish at a density of approximately  $5 \times 10^3$  cells/mL in culture media. After incubation for 24 h, the culture media were replaced with RPMI 1640 supplemented with 2% FBS, 50 units/ml penicillin and 50 mg/ml streptomycin. The culture media were replenished every 2 days. Cells were harvested and analyzed during differentiation.

**Immunocytochemistry.** The differentiated P19 cells were fixed for 20 min with 4% paraformaldehyde and 0.1% Triton X-100 in PBS and then washed with PBS. The fixed cells were incubated in blocking solutions (PBS containing 0.5% FBS) for 1 h at room temperature to reduce nonspecific adsorption of antibodies. The cells were treated with diluted primary antibodies in blocking solutions for 1 h at room temperature or overnight at 4 °C and then washed with PBS. The cells were treated with Alexa Fluor 488-conjugated secondary antibodies or biotin-labeled secondary antibodies followed by incubation with Cy3-conjugated streptavidin in blocking solutions for 1 h at room temperature. Antibodies against neuron-specific  $\beta$ III-tubulin (Tuj1), neuron specific enolase, neurofilament 200, MAP2, Nkx2.5,  $\alpha$ -MHC, GFAP and S100 were employed as primary antibodies (Table S1). Biotin-conjugated goat anti-mouse IgG, goat anti-rabbit IgG, Alexa Fluor 488-conjugated goat anti-mouse IgG and goat anti-rabbit IgG were used as secondary antibodies. After staining, cells were washed with DPBS several times and imaged by using fluorescence microscopy (Nikon Eclipse Ti-U microscope).

**Table S1. Antibodies and concentrations used for immunocytochemistry.**

|                               | Name               | Manufacturer                | Clone                            | Cat. No.            | Dilution |
|-------------------------------|--------------------|-----------------------------|----------------------------------|---------------------|----------|
| Primary antibody              | Tuj1               | Santa Cruz<br>Biotechnology | Mouse monoclonal<br>Clone TUJ-1  | sc-58888            | 1:200    |
|                               | NSE                | Santa Cruz<br>Biotechnology | Mouse monoclonal<br>Clone NSE-P1 | sc-21738            | 1:200    |
|                               | NF200              | Sigma Aldrich               | Rabbit polyclonal                | N4142               | 1:200    |
|                               | GFAP               | Abcam                       | Rabbit polyclonal                | ab7260              | 1:1000   |
|                               | S100               | Abcam                       | Rabbit polyclonal                | ab868               | 1:100    |
|                               | MAP-2              | Santa Cruz<br>Biotechnology | Rabbit monoclonal<br>Clone H-300 | sc-20172            | 1:200    |
|                               | $\alpha$ -MHC      | Abcam                       | Mouse monoclonal<br>Clone BA-G5  | ab50967             | 1:200    |
|                               | Nkx2.5             | Santa Cruz<br>Biotechnology | Mouse monoclonal<br>Clone A-3    | sc-376565           | 1:100    |
|                               | Secondary antibody | Biotin-conjugated Ab        | Sigma Aldrich                    | goat anti-Mouse IgG | B7264    |
|                               |                    | goat anti-Rabbit IgG        |                                  | B7389               | 1:250    |
| Alexa Flour 488 conjugated Ab |                    | Thermo Scientific           | goat anti-Mouse IgG              | A-11001             | 1:250    |
|                               |                    |                             | goat anti-Rabbit IgG             | A-11034             | 1:250    |

**Western blot analysis.** Proteins were separated by using 10% or 12% SDS-PAGE and transferred to the membrane (Pall Corporation). The membrane was incubated in blocking solutions (Tris-buffered saline (TBS) containing 5% nonfat skim milk and 0.5% Tween 20) for 1-2 h at room temperature to reduce nonspecific adsorption of antibodies. After the membrane was washed with TBST (TBS containing 0.5% Tween 20), it was treated with diluted primary antibodies in TBST for 1 h at room temperature or overnight at 4 °C. After washing with TBST, it was treated with diluted secondary antibodies in TBST for 1 h at room temperature. The treated membrane was visualized using the West-zol kit (iNtRON Biotechnology) in the G box chemi XT4 (Syngene). Antibodies against Tuj1, neuron specific enolase, GAP43, Nkx2.5,  $\alpha$ -MHC, GFAP and S100 were used as primary antibodies (Table S2). Peroxidase-conjugated goat anti-mouse IgG and goat anti-rabbit IgG were employed as secondary antibodies.

**Table S2. Antibodies and concentrations used for western blotting.**

|                     | Name                  | Manufacturer                         | Clone                            | Cat. No.                                    | Dilution           |                  |
|---------------------|-----------------------|--------------------------------------|----------------------------------|---------------------------------------------|--------------------|------------------|
| Primary<br>Antibody | Tuj1                  | Santa Cruz<br>Biotechnology          | Mouse monoclonal<br>Clone TUJ-1  | sc-58888                                    | 1:1000             |                  |
|                     | NSE                   | Santa Cruz<br>Biotechnology          | Mouse monoclonal<br>Clone NSE-P1 | sc-21738                                    | 1:1000             |                  |
|                     | GAP43                 | Santa Cruz<br>Biotechnology          | Mouse monoclonal<br>Clone B-5    | sc-17790                                    | 1:1000             |                  |
|                     | GFAP                  | Abcam                                | Rabbit polyclonal                | ab7260                                      | 1:10000            |                  |
|                     | S100                  | Abcam                                | Rabbit polyclonal                | ab868                                       | 1:500              |                  |
|                     | $\beta$ -actin        | Santa Cruz<br>Biotechnology          | Mouse monoclonal<br>Clone C4     | sc-47778                                    | 1:1000             |                  |
|                     | $\alpha$ -MHC         | Abcam                                | Mouse monoclonal<br>Clone BA-G5  | ab50967                                     | 1:1000             |                  |
|                     | Nkx2.5                | Santa Cruz<br>Biotechnology          | Mouse monoclonal<br>Clone A-3    | sc-376565                                   | 1:1000             |                  |
|                     | Secondary<br>Antibody | Peroxidase<br>conjugated<br>Antibody | Santa Cruz<br>Biotechnology      | goat anti-Mouse IgG<br>goat anti-Rabbit IgG | sc-2005<br>sc-2004 | 1:1000<br>1:1000 |

**Signaling pathway study.** P19 cells were seeded at a density of  $10^6$  cells/ml in 90 mm petri dishes under non-adherent culture conditions and then incubated with 0.5  $\mu$ M retinoic acid in a cell culture incubator for 3 days. The embryoid bodies were dissociated into single cells by treatment with 0.25% trypsin-EDTA solution. After washing with DPBS to remove remaining retinoic acid, trypsin and EDTA, the cells were seeded in a tissue culture dish at a density of approximately  $10^5$  cells/ml in culture media. After incubation for 24 h, the culture media were replaced with differentiation media (RPMI 1640 supplemented with 2% FBS, 50 units/ml penicillin and 50 mg/ml streptomycin containing 100  $\mu$ M EX-527) in the presence and absence of an inhibitor for the Wnt signaling pathway (25  $\mu$ M NSC668036 or 25 nM PKF118-310). Differentiation media without each inhibitor were replenished every 2 days.

**Reverse transcription polymerase chain reaction (RT-PCR).** Total RNAs were isolated using easy-BLUE (iNtRON Biotechnology) from the differentiated P19 cells at various times and subjected to cDNA synthesis using oligo(dT) primer and power cDNA synthesis kit (iNtRON Biotechnology) according to the manufacturer's instruction. The resulting cDNAs were used to determine the expression levels of genes of interest by using RT-PCR with the

Bio-Rad PCR system. The PCR primers shown in Table S3 were purchased from Bioneer (Korea).

**Table S3. Oligonucleotide sequences of primers used for RT-PCR**

| <b>Target<br/>(Mouse)</b> | <b>5'-Forward primer-3'</b> | <b>5'-Reverse primer-3'</b> | <b>Size</b> |
|---------------------------|-----------------------------|-----------------------------|-------------|
| NeuroD1                   | TTGAAGCCATGAATGCAGAG        | TTTCAAAGAAGGGCTCCAGA        | 316         |
| Mash1                     | TTCGTCCCCCTTTGATCGTG        | CCTCCCATTGACGTCGTT          | 293         |
| Neurog2                   | CAGACAACCACGCACGAGA         | CAGGTGAGGCGCATAACGAT        | 1265        |
| Neurog1                   | GCGCTTCGCCTACAACACTACAT     | CGAGGGACTACTGGGGTCAG        | 417         |
| Hes1                      | GGTGCTGATAACAGCGGAAT        | ATGCCGGGAGCTATCTTTCT        | 447         |
| Tuj1                      | CTCCCTTCGATTCCCTGGTC        | TGCTCCGAGATGCGTTTGA         | 439         |
| MAP2                      | GGATGGGCTTGTGTCTGATT        | TGGACCCACTCCACAAACT         | 428         |
| NF200                     | AGCCTGCACTACTCGCTGA         | GGCCGTTGCTTAGGGTGTG         | 178         |
| Oct4                      | AGGGATGGCATACTGTGGAC        | CCTGGGAAAGGTGTCCTGTA        | 752         |
| Nanog                     | GAGGAAGCATCGAATTCTGG '      | AAGTTATGGAGCGGAGCAGC        | 710         |
| Sox2                      | CTATTCTCCGCCAGATCTCC        | AATCTCTCCCCTTCTCCAGTTC      | 1143        |
| Nkx2.5                    | GACAAAGCCGAGACGGATGG        | CTGTGCTTGCACTTGTAGC         | 222         |
| GATA4                     | GCAGCAGCAGTGAAGAGATG        | GCGATGTCTGAGTGACAGGA        | 186         |
| $\alpha$ -MHC             | TGCACTACGGAAACATGAAGTT      | CGATGGAATAGTACACTTGCTGT     | 204         |
| Desmin                    | GTGGATGCAGCCACTCTAGC        | TTAGCCGCGATGGTCTCATAAC      | 218         |
| S100                      | AATGTGTTCCATGCCCATTCG       | ACCAGCACAACTACTCCTTG        | 197         |
| GFAP                      | TCTCGAATGACTCCTCCACTC       | AAGCTCCGCCTGGTAGACAT        | 243         |
| GAPDH                     | GCCATCAACGACCCCTTCAT        | TTCACACCCATCACAAACAT        | 314         |
| Ulf1                      | CCGTGCTACAAGTTCCCT          | AGAGTGTCGGTGCTCGTA          | 342         |
| Fgf5                      | AGTGGCTGGGCTCAATGATCAGAA    | ATCTCTGTGGACGCTGCACACTTA    | 121         |
| Fgf4                      | CTACTGCAACGTGGGCATC         | TCGGTAAAGAAAGGCACACC        | 1201        |
| SCN1a                     | TCAGAGGGAAGCACAGTAGAC       | TTCCACGCTGATTTGACAGCA       | 138         |
| SCN2a1                    | TTCATGGCTTCCAATCCCTCC       | GGTGTACGTCAGTCTTCTCT        | 254         |
| SCN3a                     | TTGCTGCTATCGAAAAGCGTG       | GCACTGAATCGAAAATTGCCT       | 247         |
| SCN8a                     | ACCCGTACTATTTGACGCAGA       | TCCCTGTGAATGTGACTCCA        | 249         |
| SIRT1                     | TGACTGGAGCTGGGGTTTCTGT      | ATCAGGTAGTTCCTCGGTGCCC      | 412         |
| mGluR7                    | AGAGCCCAGCCCTAAAAAGAA       | CCCTCCTCCCTCTCAATAGC        | 171         |
| GluK5                     | TGGCCCTCTTTATCATGGAG        | AGGTTGACTAGGCTGCT           | 469         |
| GluA2                     | TGATGAACCGCACTGACCCTA       | GGAAGAACGTGGATGTCGGA        | 219         |
| GluA3                     | CTGGAGGCCATGTTGTTTGC        | TGTACGAACCGCCAATGACTC       | 257         |

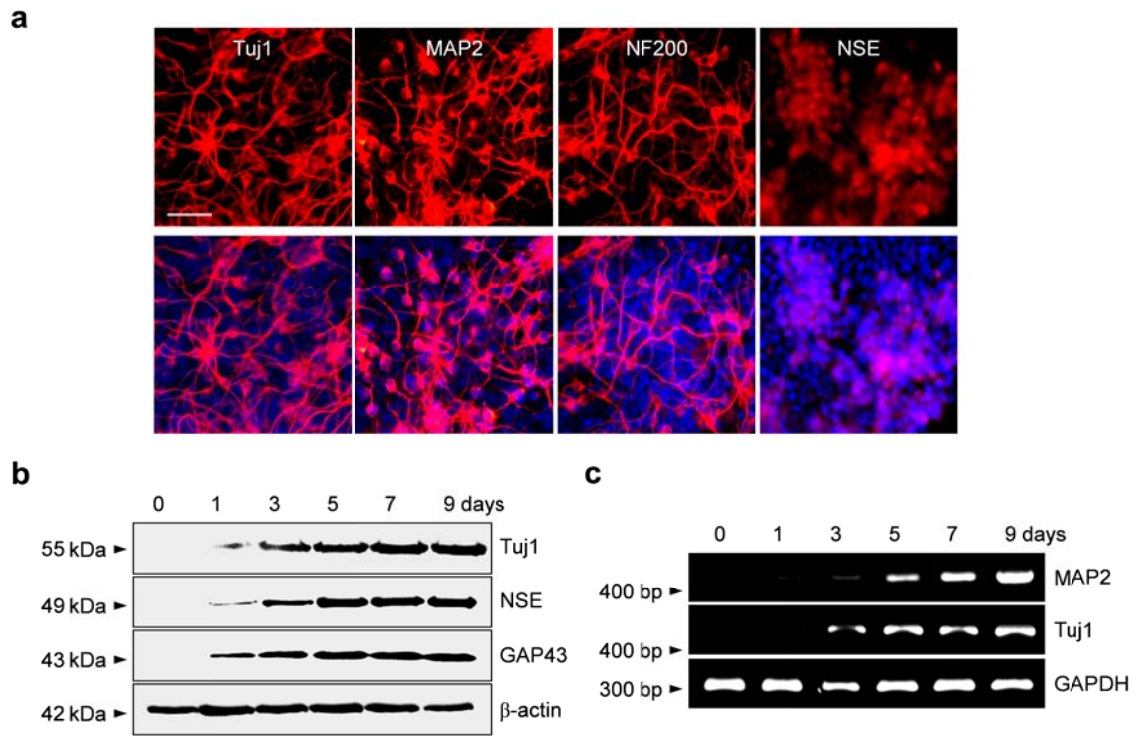

**Figure S1. Induction of neuronal differentiation of P19 cells by retinoic acid.** (a) P19 cells were incubated with 1  $\mu$ M retinoic acid for 9 days. (Upper panel) The treated cells were immunostained with neuron-specific antibodies. (Lower panel) Merged images of cells treated with antibodies and DAPI (blue). Scale bar: 50  $\mu$ m. (b) Expression levels of neuron-specific markers in the treated P19 cells were examined at various times by using western blot and (c) RT-PCR analyses.

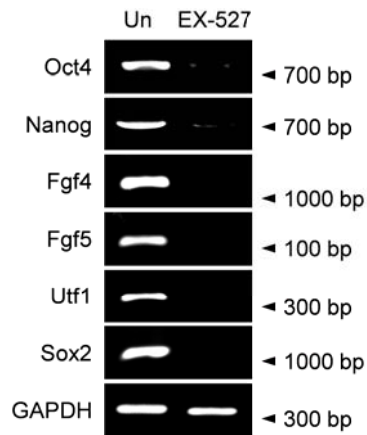

**Figure S2. Suppression of stemness of P19 cells by EX-527.** P19 cells were incubated with 100  $\mu$ M EX-527 for 9 days. Expression levels of stemness-related genes were measured by using RT-PCR analysis. Stemness-related genes were downregulated in the treated cells. ‘Un’ indicates no treatment of P19 cells with EX-527.

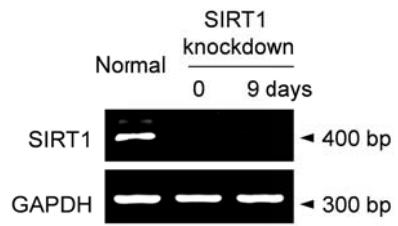

**Figure S3. Knockdown of SIRT1 in P19 cells.** A SIRT1 gene was not expressed in P19 cells by shRNA-mediated knockdown of SIRT1.



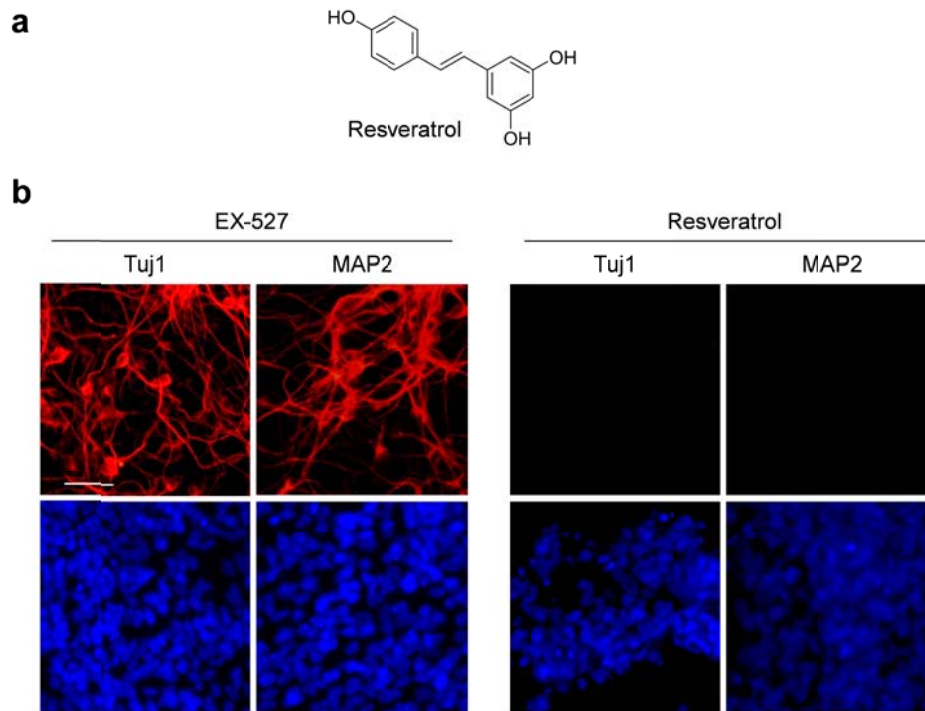

**Figure S4. A SIRT1 activator (resveratrol) does not promote neurogenesis.** (a) Chemical structure of resveratrol. (b) P19 cells were incubated with resveratrol or EX-527 for 9 days. (Upper panel) The treated cells were immunostained with neuron-specific antibodies. (Bottom panel) The nucleus of the treated cells was stained with DAPI. Scale bar, 50  $\mu\text{m}$ .

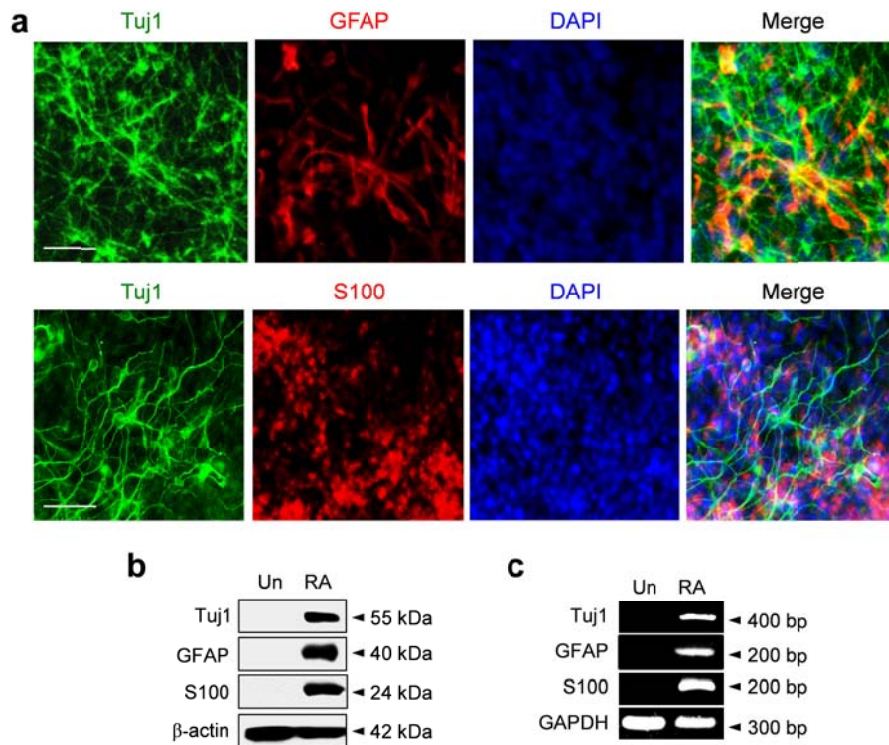

**Figure S5. Retinoic acid induces differentiation of P19 cells into neurons and astrocytes.**

(a) P19 cells were incubated with 1  $\mu$ M retinoic acid (RA) for 9 days. The cells were immunostained with antibodies against neuronal (Tuj1, green) and astrocyte-specific markers (upper: GFAP and lower: S100, red). The nucleus of cells was stained with DAPI. Scale bar, 50  $\mu$ m. (b) P19 cells were incubated with 1  $\mu$ M retinoic acid for 9 days. The expression levels of neuronal and astrocyte-specific markers in the treated cells were determined by using western blot and (c) RT-PCR analyses. ‘Un’ indicates no treatment of P19 cells with retinoic acid.

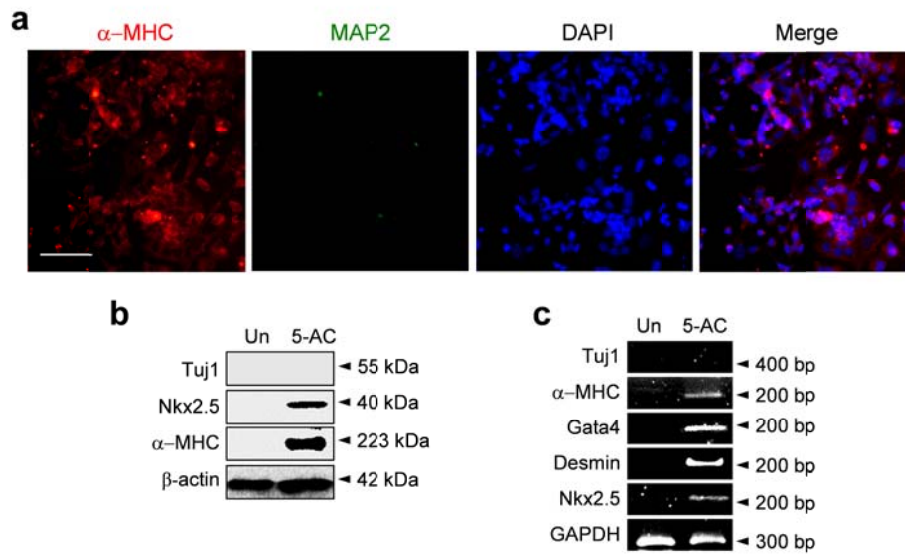

**Figure S6. P19 cells are differentiated into cardiac cells by treatment with 5-azacytidine.** (a) P19 cells were treated with 1  $\mu$ M 5-azacytidine (5-AC) for 14 days. The cells were immunostained with antibodies against neuronal (MAP2, green) and cardiac markers ( $\alpha$ -MHC, red). The nucleus of the cells was stained with DAPI. Scale bar, 50  $\mu$ m. (b) P19 cells were treated with 1  $\mu$ M 5-azacytidine for 14 days. Expression levels of neuronal and cardiac markers in the treated cells were examined by using western blot and (c) RT-PCR analyses. ‘Un’ indicates no treatment of P19 cells with 5-azacytidine.

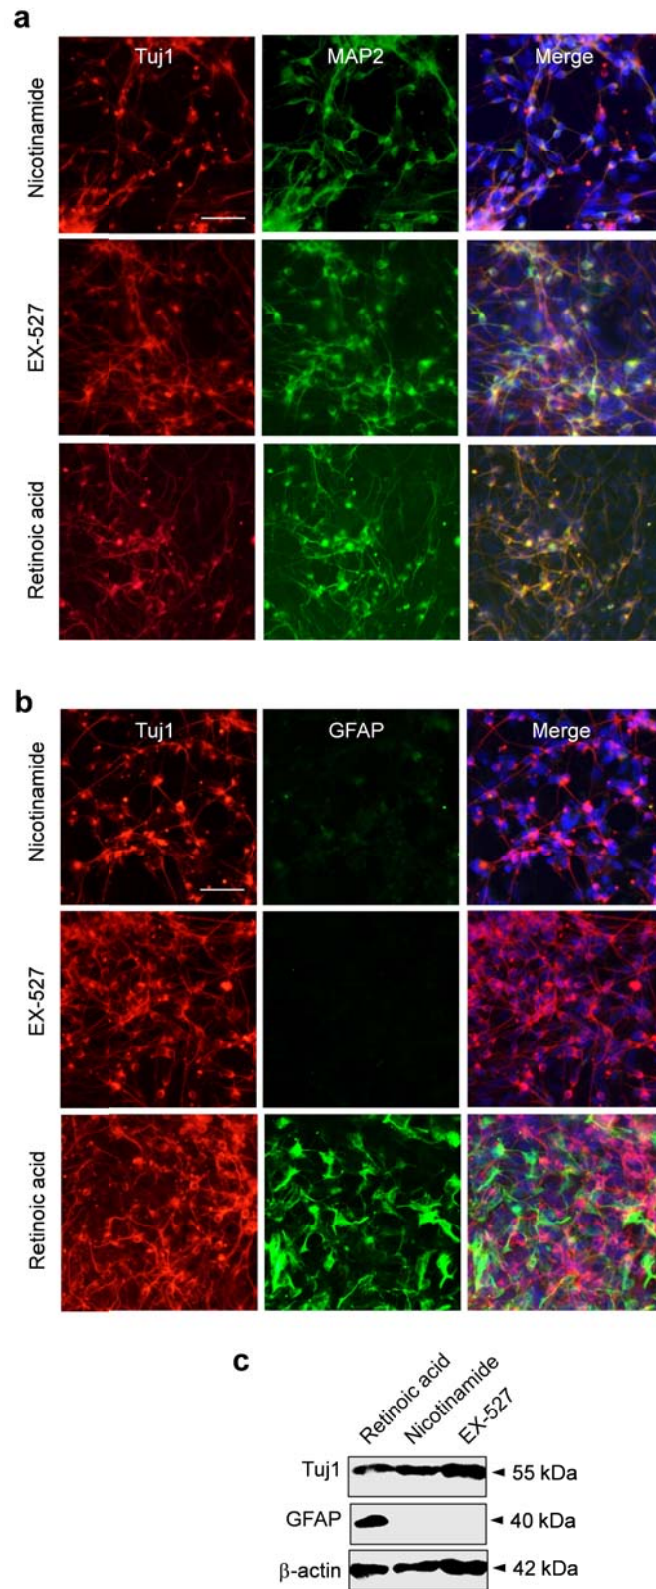

**Figure S7. Differentiation of P19 cells induced by treatment with nicotinamide, EX-527 and retinoic acid.** (a) P19 cells were incubated with 10 mM nicotinamide, 100  $\mu$ M EX-527

or 1  $\mu\text{M}$  retinoic acid for 9 days. The cells were immunostained with antibodies against neuronal markers. Merged images include DAPI to illustrate nuclei. Scale bar, 50  $\mu\text{m}$ . **(b)** P19 cells were incubated with 10 mM nicotinamide, 100  $\mu\text{M}$  EX-527 or 1  $\mu\text{M}$  retinoic acid for 14 days. The cells were immunostained with antibodies against neuronal (Tuj1, red) and astrocyte-specific markers (GFAP, green). Merged images include DAPI to illustrate nuclei. Scale bar, 50  $\mu\text{m}$ . **(c)** P19 cells were treated with 10 mM nicotinamide, 100  $\mu\text{M}$  EX-527 or 1  $\mu\text{M}$  retinoic acid for 14 days. Expression levels of neuronal and astrocyte-specific markers in the treated cells were determined by using western blot analysis.

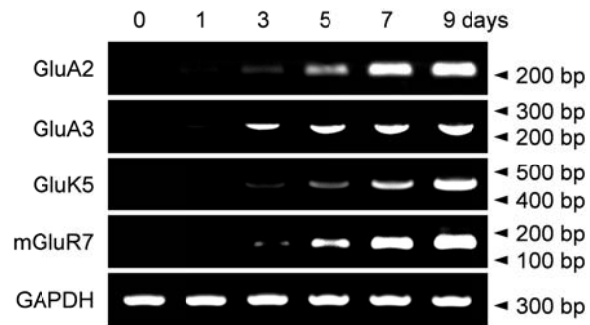

**Figure S8. P19 cells treated with EX-527 express glutamate receptor genes.** P19 cells were incubated with 100  $\mu$ M EX-527 for the indicated times. Expression levels of glutamate receptor genes in the treated cells were examined by using RT-PCR analysis.

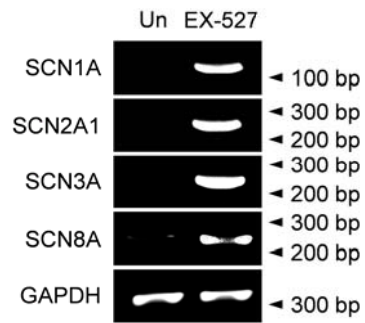

**Figure S9. P19 cells treated with EX-527 express voltage-gated sodium channel transcripts.** P19 cells were incubated with 100  $\mu$ M EX-527 for 9 days. Expression levels of sodium channel transcripts in the treated cells were examined by using RT-PCR analysis. 'Un' indicates no treatment of P19 cells with EX-527.
